# Supplementary material for: Genome-wide identification of translationally inhibited and degraded miR-155 targets using RNA-interacting protein-IP
Source: PubMed Central journal article supplement — RNA Biol. 2013 Apr 15;10(6):1017–29. doi: 10.4161/rna.24553 (PMC4111730; doi:10.4161/rna.24553), 2013-04-15
Supplement: rna-10-1017-s01.pdf [file rna-10-1017-s01.pdf]

## **Supplemental Material to:**

**Jan Meier, Volker Hovestadt, Marc Zapatka,  
Armin Pscherer, Martina Seiffert and Peter Lichter**

**Genome-wide identification of translationally  
inhibited and degraded miR-155 targets  
using RNA-interacting protein-IP**

**2013; 10(6)**

**<http://dx.doi.org/10.4161/rna.24553>**

**[www.landesbioscience.com/journals/rnabiology/article/24553/](http://www.landesbioscience.com/journals/rnabiology/article/24553/)**

HEK-vector Control

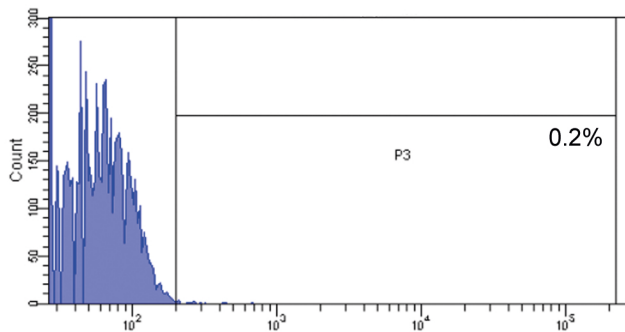

HEK-miR-155 Control

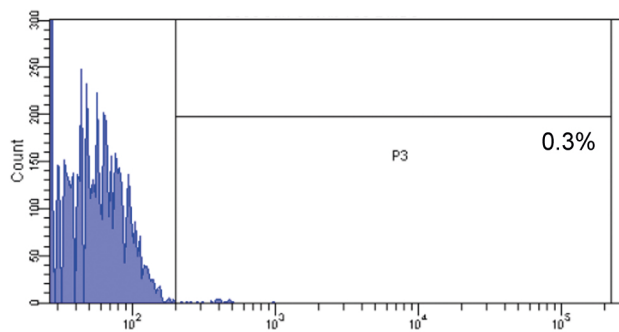

HEK-vector EdU

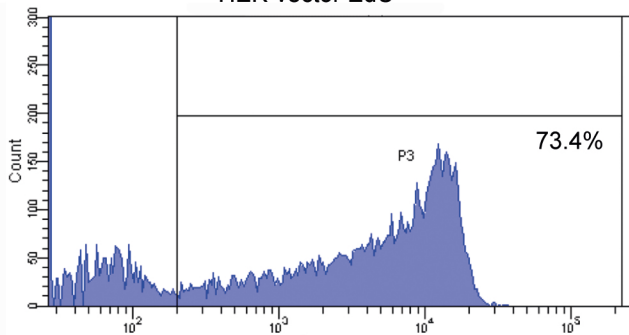

HEK-miR-155 EdU

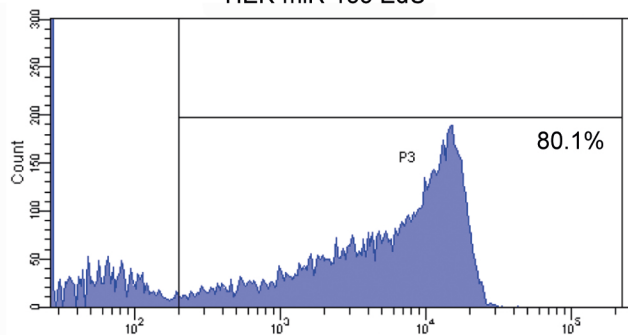

MEC-1 RIPA

MEC-1 PLB

IgG1 SN

IgG1 IP

Ago2 SN

Ago2 IP

95 kDa-

52 kDa-

34 kDa-

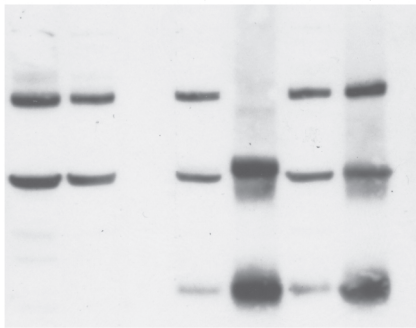

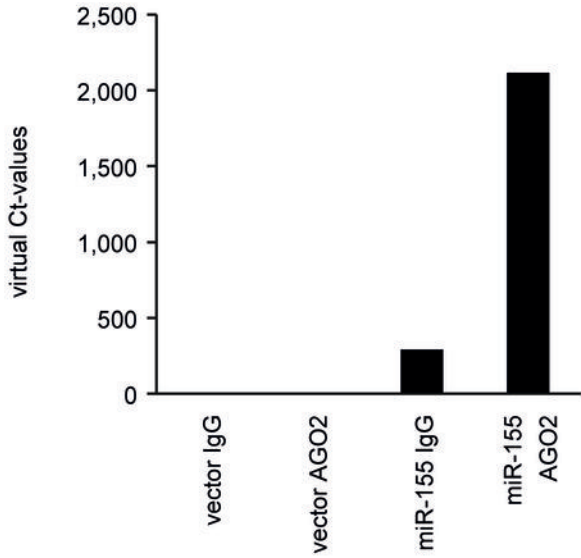

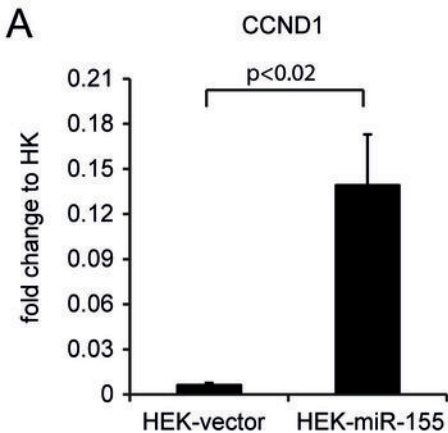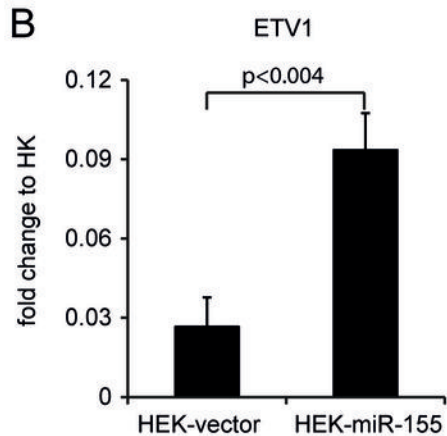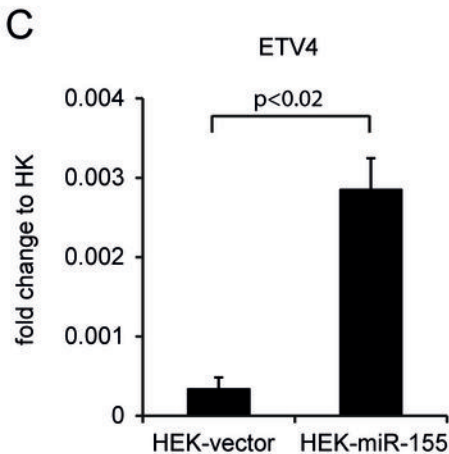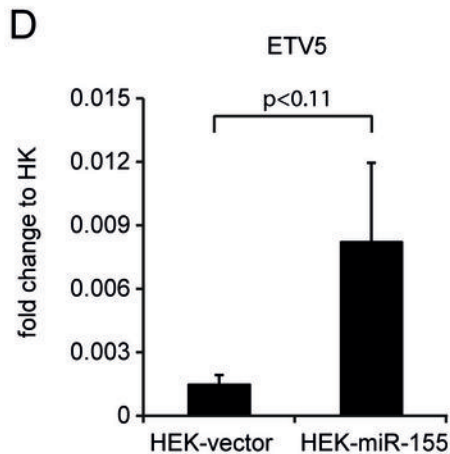

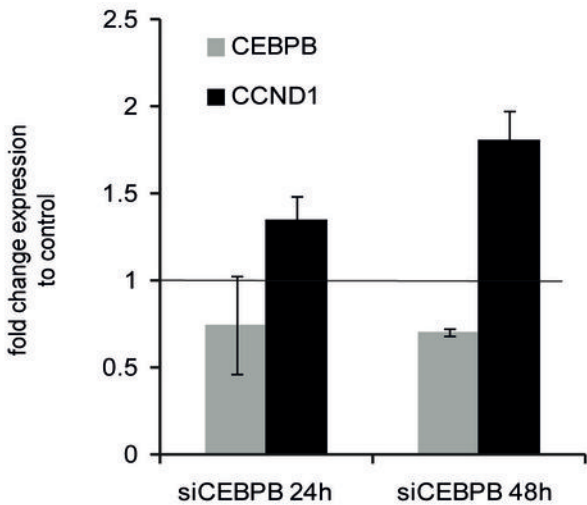

ZFP36 mRNA

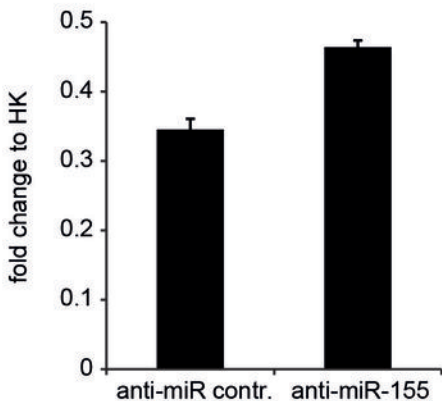

JARID2 mRNA

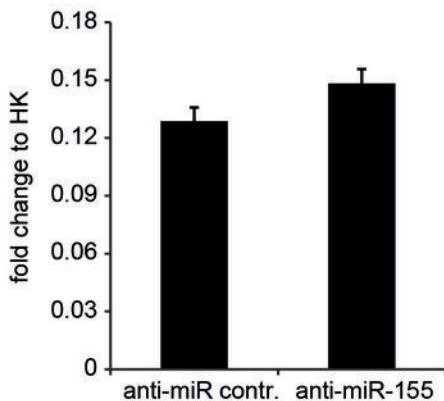

BACH1 mRNA

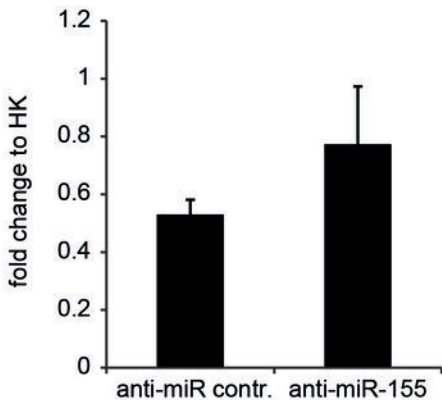

P-values (student's t-test):

ZFP36:  $p < 0.002$

JARID2:  $p < 0.15$

BACH1:  $p < 0.11$

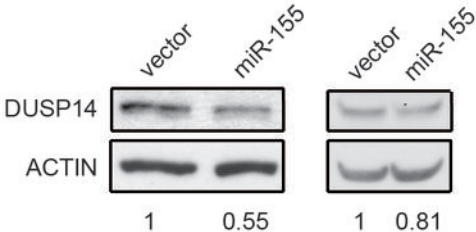



## S1 mRNAs differentially expressed in HEKmiR-155 TL

| down in HEK-miR-155 TL |           |                               | up in HEK-miR-155 TL |          |                               |
|------------------------|-----------|-------------------------------|----------------------|----------|-------------------------------|
|                        | log2 FC   | n=339<br>adjusted p-<br>value |                      | log2 FC  | n=121<br>adjusted p-<br>value |
| SPARC                  | -7.06E+00 | 7.43E-52                      | FAM78A               | 2.13E+00 | 1.38E-23                      |
| DOK6                   | -4.46E+00 | 2.05E-46                      | TNFRSF11B            | 5.53E+00 | 1.36E-19                      |
| GALNT13                | -3.38E+00 | 1.16E-43                      | DPYSL3               | 1.98E+00 | 1.94E-19                      |
| RHBDD2                 | -7.30E-01 | 1.81E-02                      | CCND1                | 4.19E+00 | 1.96E-12                      |
| CDO1                   | -5.51E+00 | 4.50E-32                      | ZNF813               | 2.02E+00 | 4.35E-12                      |
| COL2A1                 | -2.56E+00 | 1.69E-29                      | KCNQ2                | 1.32E+00 | 1.88E-10                      |
| PLA2G4A                | -4.57E+00 | 5.43E-25                      | ALDH1A2              | 1.24E+00 | 1.71E-09                      |
| TKTL1                  | -1.63E+00 | 1.15E-02                      | FAM84B               | 1.09E+00 | 1.04E-07                      |
| BAIAP3                 | -9.28E-01 | 3.91E-02                      | CA12                 | 1.14E+00 | 6.92E-07                      |
| OAS3                   | -4.97E+00 | 9.60E-24                      | NDRG1                | 1.19E+00 | 1.95E-06                      |
| EPAS1                  | -2.17E+00 | 1.09E-23                      | ZNF85                | 2.18E+00 | 3.35E-06                      |
| CALCOCO1               | -6.93E-01 | 1.00E-02                      | PROCR                | 1.04E+00 | 1.09E-05                      |
| PGCP                   | -4.30E+00 | 1.47E-22                      | EDA2R                | 3.78E+00 | 1.46E-05                      |
| UBE2QL1                | -2.74E+00 | 1.49E-22                      | ADCYAP1R1            | 9.74E-01 | 1.62E-05                      |
| ULK2                   | -1.98E+00 | 4.64E-20                      | POLR3G               | 1.14E+00 | 2.24E-05                      |
| IKZF2                  | -9.76E-01 | 4.25E-02                      | BMP2                 | 1.83E+00 | 2.51E-05                      |
| DSG2                   | -6.17E-01 | 2.00E-02                      | C19orf51             | 9.74E-01 | 4.40E-05                      |
| FGF13                  | -3.05E+00 | 6.31E-18                      | ATP1A3               | 9.36E-01 | 5.23E-05                      |
| ZFP106                 | -1.68E+00 | 4.16E-17                      | HMOX1                | 1.05E+00 | 6.45E-05                      |
| ATP9A                  | -6.35E-01 | 1.56E-02                      | LY6E                 | 8.72E-01 | 9.48E-05                      |
| PCDH10                 | -1.65E+00 | 2.50E-16                      | BEND4                | 9.23E-01 | 1.10E-04                      |
| CYP26B1                | -1.94E+00 | 3.86E-14                      | BOP1                 | 9.07E-01 | 1.38E-04                      |
| MAMLD1                 | -1.77E+00 | 4.35E-14                      | TRMT12               | 8.56E-01 | 3.61E-04                      |
| FAT3                   | -2.08E+00 | 2.23E-13                      | COTL1                | 8.24E-01 | 5.14E-04                      |
| PRKCB                  | -1.61E+00 | 1.70E-12                      | ZNF256               | 1.25E+00 | 5.54E-04                      |
| SNCAIP                 | -1.09E+00 | 2.37E-02                      | MRPL13               | 8.04E-01 | 6.32E-04                      |
| OPTN                   | -1.36E+00 | 2.79E-11                      | EXT1                 | 8.09E-01 | 7.92E-04                      |
| PLCB2                  | -2.78E+00 | 2.87E-11                      | SPRY1                | 8.28E-01 | 8.33E-04                      |
| MGAT4A                 | -5.78E-01 | 4.88E-02                      | KLRG2                | 8.24E-01 | 1.22E-03                      |
| CYBRD1                 | -7.80E-01 | 2.37E-02                      | ETV1                 | 1.25E+00 | 1.57E-03                      |
| CLCN4                  | -1.81E+00 | 3.68E-02                      | DHRS2                | 1.13E+00 | 1.61E-03                      |
| PTGS2                  | -3.46E+00 | 1.87E-02                      | C8orf33              | 7.39E-01 | 2.20E-03                      |
| SAMD12                 | -1.69E+00 | 8.51E-11                      | ALPL                 | 8.46E-01 | 2.88E-03                      |
| FOSL2                  | -7.67E-01 | 2.04E-02                      | ARSJ                 | 9.01E-01 | 3.05E-03                      |
| PLD1                   | -9.16E-01 | 4.03E-02                      | ELOVL6               | 7.35E-01 | 3.53E-03                      |
| B3GALT1                | -2.23E+00 | 1.30E-10                      | ABCE1                | 6.83E-01 | 3.58E-03                      |
| NES                    | -2.77E+00 | 2.48E-10                      | C12orf35             | 7.26E-01 | 3.62E-03                      |
| EDIL3                  | -4.31E+00 | 2.49E-10                      | FAM150A              | 1.93E+00 | 3.67E-03                      |
| ST8SIA4                | -3.77E+00 | 3.70E-10                      | COL14A1              | 1.28E+00 | 3.80E-03                      |
| FAM20C                 | -1.46E+00 | 2.15E-09                      | DNMT3B               | 7.34E-01 | 3.93E-03                      |
| PPP1R15A               | -7.31E-01 | 1.42E-02                      | SULT1A1              | 1.04E+00 | 3.93E-03                      |
| CDH2                   | -1.74E+00 | 2.18E-09                      | TATDN1               | 7.31E-01 | 4.06E-03                      |
| STXBP5L                | -2.22E+00 | 2.51E-09                      | GPATCH4              | 7.12E-01 | 4.29E-03                      |
| EBF4                   | -7.17E-01 | 2.98E-02                      | SPRED2               | 7.40E-01 | 4.96E-03                      |
| YPEL3                  | -9.37E-01 | 2.48E-02                      | TERT                 | 1.30E+00 | 4.98E-03                      |
| EHBP1L1                | -1.46E+00 | 7.13E-09                      | RNF125               | 7.19E-01 | 5.25E-03                      |

|          |           |          |           |          |          |
|----------|-----------|----------|-----------|----------|----------|
| MYO3A    | -9.71E-01 | 3.09E-02 | GPRIN3    | 7.53E-01 | 5.34E-03 |
| MMP11    | -6.53E-01 | 5.00E-02 | PYCR1     | 7.81E-01 | 5.43E-03 |
| MYO5B    | -1.60E+00 | 1.15E-08 | RASGEF1A  | 7.31E-01 | 5.83E-03 |
| CELF2    | -1.97E+00 | 1.17E-08 | THEM4     | 6.95E-01 | 6.45E-03 |
| RYR2     | -2.72E+00 | 1.27E-08 | FBXO32    | 7.56E-01 | 6.97E-03 |
| SLC8A3   | -2.21E+00 | 1.77E-02 | PDZRN3    | 7.76E-01 | 7.48E-03 |
| RPS6KA5  | -6.65E-01 | 3.52E-02 | RAB39     | 9.65E-01 | 7.58E-03 |
| KCNQ1    | -1.72E+00 | 1.82E-08 | POP1      | 6.83E-01 | 7.91E-03 |
| ESRRG    | -2.56E+00 | 2.00E-08 | KHDRBS3   | 7.12E-01 | 8.54E-03 |
| PRKG2    | -2.88E+00 | 2.20E-08 | SLC11A1   | 1.49E+00 | 8.66E-03 |
| SNPH     | -6.92E-01 | 2.49E-02 | ETV5      | 1.85E+00 | 8.71E-03 |
| JAG1     | -8.79E-01 | 2.65E-02 | HSPE1     | 6.82E-01 | 8.99E-03 |
| APH1B    | -1.24E+00 | 2.20E-08 | ETV4      | 2.16E+00 | 9.60E-03 |
| CHRD1    | -1.32E+00 | 1.63E-02 | FAM49B    | 6.55E-01 | 9.91E-03 |
| SYTL4    | -6.71E-01 | 3.17E-02 | TMEM145   | 8.37E-01 | 1.02E-02 |
| TTBK2    | -1.23E+00 | 2.20E-08 | PALM2     | 1.01E+00 | 1.02E-02 |
| GALC     | -1.55E+00 | 5.19E-08 | GABRD     | 9.54E-01 | 1.10E-02 |
| AIFM2    | -2.15E+00 | 5.20E-08 | FAM91A1   | 6.37E-01 | 1.16E-02 |
| FOXF1    | -6.61E-01 | 2.74E-02 | EFR3A     | 6.42E-01 | 1.17E-02 |
| STARD9   | -1.19E+00 | 6.24E-08 | CAMKV     | 7.14E-01 | 1.26E-02 |
| SERPING1 | -3.40E+00 | 8.57E-08 | WDR67     | 6.47E-01 | 1.30E-02 |
| BMF      | -1.44E+00 | 2.05E-02 | UTP23     | 6.45E-01 | 1.33E-02 |
| SPINT2   | -1.72E+00 | 8.66E-08 | ZNF44     | 8.38E-01 | 1.38E-02 |
| CCNDBP1  | -1.20E+00 | 1.09E-07 | TEX15     | 6.45E-01 | 1.54E-02 |
| WNT9A    | -1.61E+00 | 1.40E-07 | SEH1L     | 6.25E-01 | 1.56E-02 |
| DMRT3    | -2.91E+00 | 2.34E-07 | PCDH19    | 8.58E-01 | 1.62E-02 |
| DDIT4L   | -1.62E+00 | 2.93E-07 | PPID      | 6.26E-01 | 1.74E-02 |
| SNAP91   | -1.88E+00 | 3.71E-07 | CACYBP    | 6.22E-01 | 1.78E-02 |
| CACNA1G  | -1.58E+00 | 5.05E-07 | TNFRSF10D | 6.87E-01 | 1.87E-02 |
| C1orf172 | -4.00E+00 | 5.24E-07 | C4orf43   | 6.09E-01 | 1.96E-02 |
| DNAH11   | -7.99E-01 | 5.00E-02 | ADA       | 6.85E-01 | 2.00E-02 |
| LGALS1   | -1.18E+00 | 5.54E-07 | ZNF586    | 8.54E-01 | 2.00E-02 |
| SLIT2    | -1.04E+00 | 6.92E-07 | DSCC1     | 5.93E-01 | 2.00E-02 |
| UBR1     | -1.09E+00 | 8.39E-07 | MT1X      | 7.22E-01 | 2.04E-02 |
| EPHB6    | -1.61E+00 | 4.37E-02 | TRIB1     | 1.20E+00 | 2.04E-02 |
| HSPB1    | -6.79E-01 | 1.24E-02 | CYC1      | 7.01E-01 | 2.14E-02 |
| NACAD    | -1.33E+00 | 8.42E-07 | EGLN3     | 6.74E-01 | 2.24E-02 |
| RGP1     | -5.63E-01 | 4.88E-02 | TAP2      | 6.40E-01 | 2.32E-02 |
| ATRNL1   | -6.82E-01 | 3.07E-02 | CHRAC1    | 6.24E-01 | 2.32E-02 |
| EFNB3    | -6.17E-01 | 3.00E-02 | MMP2      | 9.21E-01 | 2.35E-02 |
| NMU      | -6.88E-01 | 2.26E-02 | CHRNA4    | 1.34E+00 | 2.35E-02 |
| LCMT2    | -1.08E+00 | 1.95E-06 | C3orf14   | 6.10E-01 | 2.43E-02 |
| PRRX1    | -2.33E+00 | 2.60E-06 | BCL6B     | 6.20E-01 | 2.85E-02 |
| HOXA5    | -1.15E+00 | 2.60E-06 | NRG2      | 9.31E-01 | 2.95E-02 |
| SOX6     | -7.06E-01 | 2.61E-02 | WT1       | 6.78E-01 | 2.97E-02 |
| RAI2     | -1.51E+00 | 3.01E-06 | NIP7      | 5.97E-01 | 2.99E-02 |
| VPS39    | -1.01E+00 | 3.23E-06 | NEIL2     | 6.46E-01 | 2.99E-02 |
| ODZ1     | -4.93E+00 | 3.35E-06 | TRIM71    | 7.61E-01 | 2.99E-02 |
| SMOC2    | -4.05E+00 | 3.27E-02 | IL12RB2   | 8.68E-01 | 3.08E-02 |
| CUL9     | -6.73E-01 | 1.31E-02 | TESC      | 7.78E-01 | 3.09E-02 |

|            |           |          |          |          |          |
|------------|-----------|----------|----------|----------|----------|
| OSBPL7     | -1.39E+00 | 3.80E-06 | SQLE     | 5.86E-01 | 3.15E-02 |
| TTC9       | -1.34E+00 | 4.62E-06 | SLC24A4  | 8.73E-01 | 3.23E-02 |
| SLC27A6    | -1.14E+00 | 1.83E-02 | LYAR     | 5.91E-01 | 3.23E-02 |
| GPRC5C     | -1.55E+00 | 4.91E-06 | HRSP12   | 6.01E-01 | 3.24E-02 |
| TRIM23     | -6.78E-01 | 1.42E-02 | FBXO41   | 6.51E-01 | 3.24E-02 |
| CDAN1      | -1.06E+00 | 5.06E-06 | TOP1MT   | 5.97E-01 | 3.24E-02 |
| PLCL1      | -1.71E+00 | 5.08E-06 | TRPS1    | 5.95E-01 | 3.27E-02 |
| MBP        | -1.54E+00 | 5.08E-06 | CCT6A    | 5.69E-01 | 3.39E-02 |
| GCA        | -6.57E-01 | 3.10E-02 | ZNF528   | 1.63E+00 | 3.52E-02 |
| BEX2       | -9.82E-01 | 5.95E-06 | NFASC    | 8.08E-01 | 3.55E-02 |
| PDE10A     | -1.34E+00 | 6.34E-06 | ZC3H15   | 5.74E-01 | 3.55E-02 |
| TMEM62     | -1.08E+00 | 6.90E-06 | PRPS2    | 5.66E-01 | 3.69E-02 |
| CXCL16     | -1.04E+00 | 6.90E-06 | NCS1     | 5.89E-01 | 3.74E-02 |
| TMEM87A    | -9.99E-01 | 6.90E-06 | PLCD3    | 5.85E-01 | 3.94E-02 |
| PARD3B     | -6.86E-01 | 3.85E-02 | PRR5L    | 8.79E-01 | 4.07E-02 |
| SPTAN1     | -9.51E-01 | 1.04E-05 | ANKRD34A | 6.69E-01 | 4.20E-02 |
| ADAL       | -1.00E+00 | 1.21E-05 | ASAP1    | 5.68E-01 | 4.23E-02 |
| ANKRD1     | -1.48E+00 | 1.22E-05 | ADAT2    | 5.88E-01 | 4.28E-02 |
| MNS1       | -1.42E+00 | 1.22E-05 | ZNF121   | 6.05E-01 | 4.48E-02 |
| CLVS2      | -2.37E+00 | 1.27E-05 | GCLM     | 5.55E-01 | 4.50E-02 |
| YPEL5      | -6.88E-01 | 4.16E-02 | RBFOX3   | 1.16E+00 | 4.50E-02 |
| NME5       | -2.31E+00 | 1.49E-05 | OR2V2    | 4.11E+00 | 4.77E-02 |
| LPL        | -2.24E+00 | 1.57E-05 | FAM196A  | 1.31E+00 | 4.78E-02 |
| PTGFR      | -1.26E+00 | 1.28E-02 | C1QBP    | 5.48E-01 | 4.86E-02 |
| AS3MT      | -1.03E+00 | 1.57E-05 | EPHA8    | 1.00E+00 | 5.00E-02 |
| LRP1       | -5.99E-01 | 3.92E-02 |          |          |          |
| GOS2       | -1.86E+00 | 2.14E-05 |          |          |          |
| BEND5      | -2.59E+00 | 2.24E-05 |          |          |          |
| LSR        | -9.72E-01 | 2.31E-05 |          |          |          |
| POR        | -6.02E-01 | 3.14E-02 |          |          |          |
| AC010336.1 | -1.47E+00 | 2.63E-05 |          |          |          |
| TMSB4X     | -1.40E+00 | 3.06E-05 |          |          |          |
| ZSCAN29    | -9.39E-01 | 3.23E-05 |          |          |          |
| EPSTI1     | -1.61E+00 | 3.63E-05 |          |          |          |
| STARD8     | -7.44E-01 | 3.39E-02 |          |          |          |
| BASP1      | -2.88E+00 | 3.80E-05 |          |          |          |
| PGPEP1     | -6.14E-01 | 3.65E-02 |          |          |          |
| PLXNA3     | -6.54E-01 | 1.52E-02 |          |          |          |
| GANC       | -1.04E+00 | 3.80E-05 |          |          |          |
| TP53INP1   | -9.90E-01 | 4.09E-05 |          |          |          |
| LGALS3     | -8.44E-01 | 1.48E-02 |          |          |          |
| LRRTM4     | -1.73E+00 | 4.57E-05 |          |          |          |
| ITGB4      | -9.06E-01 | 1.80E-02 |          |          |          |
| LYPD6      | -9.44E-01 | 4.62E-05 |          |          |          |
| INADL      | -6.00E-01 | 4.51E-02 |          |          |          |
| MTMR11     | -1.30E+00 | 5.23E-05 |          |          |          |
| APOBEC3B   | -1.69E+00 | 5.41E-05 |          |          |          |
| SORT1      | -5.46E-01 | 4.57E-02 |          |          |          |
| FBXO27     | -1.03E+00 | 5.90E-05 |          |          |          |
| AHRR       | -9.02E-01 | 5.96E-05 |          |          |          |

|          |           |          |
|----------|-----------|----------|
| EDNRB    | -4.91E+00 | 4.40E-02 |
| MIXL1    | -1.78E+00 | 5.96E-05 |
| LRRC57   | -9.43E-01 | 8.24E-05 |
| SLC22A23 | -6.19E-01 | 3.00E-02 |
| SPTB     | -1.16E+00 | 9.61E-05 |
| PLD5     | -3.79E+00 | 1.09E-04 |
| TCP11L2  | -1.09E+00 | 1.12E-04 |
| KCTD12   | -9.23E-01 | 1.22E-04 |
| SLC44A5  | -6.15E-01 | 3.26E-02 |
| CYP1B1   | -2.21E+00 | 2.18E-02 |
| PVALB    | -1.98E+00 | 1.22E-04 |
| HOXA6    | -1.69E+00 | 1.28E-04 |
| DKK3     | -1.38E+00 | 1.59E-04 |
| FRAS1    | -6.65E-01 | 1.50E-02 |
| SLC38A4  | -1.64E+00 | 1.12E-02 |
| IFI27L2  | -9.44E-01 | 1.59E-04 |
| SNAP23   | -8.66E-01 | 1.59E-04 |
| FAM105A  | -8.49E-01 | 2.48E-04 |
| OTX2     | -1.28E+00 | 2.58E-04 |
| CACNA2D3 | -1.04E+00 | 2.63E-04 |
| FREM2    | -9.02E-01 | 2.78E-04 |
| IQGAP1   | -6.55E-01 | 1.39E-02 |
| SECTM1   | -1.68E+00 | 1.11E-02 |
| FAM71E1  | -1.13E+00 | 1.24E-02 |
| ATP6V1G1 | -8.16E-01 | 3.25E-04 |
| BRWD3    | -8.60E-01 | 3.40E-04 |
| HMCN1    | -1.38E+00 | 1.26E-02 |
| SLITRK5  | -8.45E-01 | 3.40E-04 |
| LYST     | -5.97E-01 | 4.72E-02 |
| ABHD1    | -1.12E+00 | 3.52E-02 |
| RAPGEF2  | -8.49E-01 | 3.67E-04 |
| ZNF652   | -8.50E-01 | 3.91E-04 |
| IGSF11   | -3.03E+00 | 4.00E-04 |
| GAB3     | -1.64E+00 | 4.62E-04 |
| EFEMP2   | -1.62E+00 | 4.77E-04 |
| DTX1     | -3.42E+00 | 4.78E-04 |
| TSLP     | -9.32E-01 | 4.57E-02 |
| GPR126   | -1.05E+00 | 4.78E-04 |
| NR3C2    | -8.98E-01 | 4.97E-04 |
| GSN      | -6.77E-01 | 2.97E-02 |
| CDHR1    | -9.69E-01 | 1.89E-02 |
| TRIM36   | -9.26E-01 | 5.09E-04 |
| FGF9     | -1.78E+00 | 5.77E-04 |
| HES1     | -8.33E-01 | 5.82E-04 |
| KCNA6    | -2.64E+00 | 1.07E-02 |
| TMTC2    | -1.29E+00 | 5.83E-04 |
| TMEM86A  | -8.82E-01 | 1.61E-02 |
| COL4A4   | -2.14E+00 | 6.36E-04 |
| MFSD6    | -9.51E-01 | 2.36E-02 |
| LAMB2    | -8.18E-01 | 6.53E-04 |

|          |           |          |
|----------|-----------|----------|
| HSPB8    | -1.48E+00 | 4.50E-02 |
| KCNK13   | -1.21E+00 | 3.10E-02 |
| GUCY1A2  | -1.66E+00 | 1.28E-02 |
| IGFBPL1  | -5.66E+00 | 7.70E-04 |
| AHR      | -9.12E-01 | 8.04E-04 |
| GPX3     | -7.78E-01 | 8.04E-04 |
| SLC16A5  | -3.42E+00 | 8.98E-04 |
| BACH1    | -6.31E-01 | 2.32E-02 |
| PCDH1    | -1.20E+00 | 2.93E-02 |
| LRRN2    | -1.32E+00 | 8.98E-04 |
| NMNAT2   | -1.22E+00 | 1.00E-02 |
| MAP6     | -1.24E+00 | 8.98E-04 |
| JARID2   | -7.99E-01 | 9.35E-04 |
| CAMK4    | -1.04E+00 | 9.66E-04 |
| PPP1R9A  | -9.75E-01 | 3.63E-02 |
| PINK1    | -6.42E-01 | 2.04E-02 |
| L3MBTL4  | -1.26E+00 | 1.00E-03 |
| CA8      | -2.48E+00 | 1.04E-03 |
| C19orf57 | -9.75E-01 | 1.08E-03 |
| ISM1     | -1.02E+00 | 1.13E-03 |
| TM7SF2   | -7.81E-01 | 1.17E-03 |
| SCN1B    | -1.23E+00 | 1.18E-03 |
| NPY1R    | -2.92E+00 | 1.24E-03 |
| ITGA8    | -8.05E-01 | 1.30E-03 |
| SLAIN1   | -9.36E-01 | 1.32E-03 |
| TUBGCP4  | -7.73E-01 | 1.39E-03 |
| GFI1     | -7.99E-01 | 2.00E-02 |
| LONRF2   | -8.08E-01 | 1.43E-03 |
| ANTXR2   | -7.41E-01 | 2.38E-02 |
| FSTL1    | -6.61E-01 | 1.03E-02 |
| LMOD1    | -8.31E-01 | 2.49E-02 |
| ZNF513   | -6.37E-01 | 1.96E-02 |
| QPCT     | -1.19E+00 | 1.47E-03 |
| KLHL32   | -1.75E+00 | 1.57E-03 |
| SLC46A3  | -8.47E-01 | 1.65E-03 |
| SYT1     | -8.51E-01 | 1.67E-03 |
| CXCL12   | -6.09E+00 | 1.79E-03 |
| FOXQ1    | -1.58E+00 | 4.74E-02 |
| SLC13A4  | -9.15E-01 | 2.51E-02 |
| PLAT     | -1.28E+00 | 1.82E-03 |
| MCOLN3   | -8.39E-01 | 1.88E-03 |
| HDX      | -7.55E-01 | 2.26E-02 |
| MAP7     | -7.79E-01 | 1.99E-03 |
| KIF1A    | -2.26E+00 | 2.02E-03 |
| CXCR4    | -1.73E+00 | 2.29E-03 |
| PROX1    | -9.50E-01 | 2.38E-03 |
| MAN1C1   | -9.90E-01 | 2.39E-03 |
| ADAMTS15 | -8.46E-01 | 3.39E-02 |
| C10orf26 | -5.69E-01 | 3.27E-02 |
| KRBA2    | -2.32E+00 | 2.43E-03 |

|          |           |          |
|----------|-----------|----------|
| TMEM132E | -2.30E+00 | 2.68E-03 |
| PLEKHA7  | -6.73E-01 | 3.56E-02 |
| SLFN5    | -9.40E-01 | 3.28E-02 |
| PIK3CD   | -8.07E-01 | 2.77E-03 |
| DCHS1    | -9.49E-01 | 2.97E-03 |
| MIDN     | -9.07E-01 | 5.00E-02 |
| CLSTN2   | -2.73E+00 | 2.97E-03 |
| NPFFR2   | -3.34E+00 | 2.99E-03 |
| ABCA3    | -1.09E+00 | 1.40E-02 |
| TAP1     | -5.99E-01 | 4.03E-02 |
| NPR1     | -1.99E+00 | 3.05E-03 |
| C18orf1  | -6.81E-01 | 3.44E-02 |
| ANG      | -1.42E+00 | 3.24E-03 |
| MOB3C    | -9.98E-01 | 3.36E-03 |
| TAPT1    | -6.41E-01 | 2.32E-02 |
| VGLL2    | -9.36E-01 | 3.57E-02 |
| MXD1     | -7.58E-01 | 3.36E-03 |
| OCLN     | -7.49E-01 | 3.36E-03 |
| MYO7A    | -3.43E+00 | 3.36E-03 |
| S1PR1    | -1.03E+00 | 3.36E-03 |
| THRB     | -7.70E-01 | 3.59E-03 |
| KCNS3    | -1.09E+00 | 2.86E-02 |
| DLK2     | -7.06E-01 | 3.55E-02 |
| BRSK1    | -8.58E-01 | 3.93E-03 |
| TTLL7    | -7.59E-01 | 4.06E-03 |
| DPY19L1  | -6.11E-01 | 3.04E-02 |
| IQGAP3   | -7.44E-01 | 4.22E-03 |
| FAM131A  | -7.00E-01 | 2.04E-02 |
| MCTP1    | -1.24E+00 | 1.91E-02 |
| PRDM8    | -1.41E+00 | 4.40E-03 |
| KDM5B    | -7.20E-01 | 4.41E-03 |
| CFHR3    | -1.94E+00 | 4.96E-03 |
| BOK      | -8.75E-01 | 3.86E-02 |
| RPRM     | -2.93E+00 | 3.39E-02 |
| ZFP36    | -8.59E-01 | 4.98E-03 |
| DMRTA2   | -1.63E+00 | 5.04E-03 |
| ACVR1C   | -1.54E+00 | 5.04E-03 |
| APOLD1   | -7.64E-01 | 1.27E-02 |
| GPM6A    | -9.38E-01 | 5.19E-03 |
| WSCD1    | -9.60E-01 | 1.78E-02 |
| C8orf42  | -1.21E+00 | 2.97E-02 |
| SLC2A10  | -7.82E-01 | 5.45E-03 |
| FCGRT    | -7.50E-01 | 5.46E-03 |
| RPH3AL   | -8.94E-01 | 1.23E-02 |
| TMSB15A  | -7.33E-01 | 5.59E-03 |
| RFX6     | -1.86E+00 | 5.82E-03 |
| PLXNA4   | -3.00E+00 | 5.83E-03 |
| ARHGEF17 | -7.69E-01 | 5.83E-03 |
| ABAT     | -6.44E-01 | 4.01E-02 |
| DSCR6    | -7.45E-01 | 1.81E-02 |

|              |           |          |
|--------------|-----------|----------|
| HAUS2        | -7.12E-01 | 5.85E-03 |
| NUDT14       | -6.64E-01 | 3.52E-02 |
| RIMS1        | -2.71E+00 | 6.11E-03 |
| LSAMP        | -4.01E+00 | 6.19E-03 |
| FGF12        | -2.50E+00 | 6.59E-03 |
| ZNF467       | -1.30E+00 | 6.88E-03 |
| TCN2         | -2.76E+00 | 2.35E-02 |
| HS6ST3       | -1.72E+00 | 1.00E-02 |
| METTL7A      | -7.81E-01 | 4.32E-02 |
| HOXA4        | -1.02E+00 | 7.00E-03 |
| RAB9B        | -8.09E-01 | 7.00E-03 |
| PAK3         | -1.42E+00 | 7.34E-03 |
| CAV1         | -9.22E-01 | 7.39E-03 |
| SPOCK3       | -1.44E+00 | 7.44E-03 |
| ALG1L        | -9.00E-01 | 4.33E-02 |
| SLC35F1      | -6.26E-01 | 2.54E-02 |
| PARD6A       | -1.06E+00 | 7.91E-03 |
| ARHGAP33     | -7.68E-01 | 8.02E-03 |
| GALNT3       | -3.05E+00 | 8.19E-03 |
| GMCL1        | -7.08E-01 | 8.21E-03 |
| LGR5         | -8.71E-01 | 8.42E-03 |
| DTX3L        | -7.66E-01 | 8.46E-03 |
| CHSY3        | -7.78E-01 | 4.03E-02 |
| KIAA1539     | -8.79E-01 | 8.66E-03 |
| MT1F         | -1.20E+00 | 1.43E-02 |
| PTPRO        | -1.65E+00 | 8.72E-03 |
| LHX9         | -1.15E+00 | 8.86E-03 |
| C2orf72      | -7.59E-01 | 1.80E-02 |
| MICB         | -7.71E-01 | 4.01E-02 |
| RET          | -9.22E-01 | 8.86E-03 |
| GFRA1        | -1.14E+00 | 8.91E-03 |
| TMEM200C     | -1.58E+00 | 1.02E-02 |
| DDAH2        | -7.29E-01 | 1.78E-02 |
| HOXA3        | -9.18E-01 | 9.12E-03 |
| PRKCH        | -7.96E-01 | 9.13E-03 |
| TP73         | -6.94E-01 | 9.41E-03 |
| KIAA0913     | -5.64E-01 | 4.75E-02 |
| RP11-428C6.1 | -9.18E-01 | 2.47E-02 |
| KCNT2        | -2.07E+00 | 9.69E-03 |
| ATXN1L       | -5.93E-01 | 2.39E-02 |
| EPPK1        | -2.12E+00 | 3.39E-02 |
| PCDHGC4      | -1.51E+00 | 2.24E-02 |
| PRR16        | -1.11E+00 | 9.98E-03 |

## S2 mRNAs differentially enriched in IP fractions

| enriched in HEK-vector |           |                  | enriched in HEK-miR-155 |          |                  |
|------------------------|-----------|------------------|-------------------------|----------|------------------|
|                        |           | n=409            |                         |          | n=213            |
|                        | log2 FC   | adjusted p-value |                         | log2 FC  | adjusted p-value |
| SPARC                  | -4.70E+00 | 3.71E-27         | TNFRSF11B               | 6.10E+00 | 7.99E-17         |
| GALNT13                | -2.84E+00 | 6.11E-26         | FAM78A                  | 1.78E+00 | 4.29E-16         |
| EPAS1                  | -2.26E+00 | 1.28E-22         | KCNQ2                   | 1.59E+00 | 2.20E-15         |
| DOK6                   | -3.79E+00 | 1.47E-22         | C21orf37                | 5.59E+00 | 7.51E-11         |
| COL2A1                 | -2.47E+00 | 6.07E-20         | CCND1                   | 3.88E+00 | 1.03E-10         |
| ULK2                   | -2.06E+00 | 2.41E-19         | DPYSL3                  | 1.55E+00 | 5.27E-10         |
| UBE2QL1                | -2.71E+00 | 2.56E-18         | TCF4                    | 1.32E+00 | 5.38E-10         |
| CDO1                   | -4.58E+00 | 8.50E-17         | ALDH1A2                 | 1.23E+00 | 2.65E-09         |
| CYP26B1                | -2.26E+00 | 1.06E-16         | ZNF483                  | 1.92E+00 | 2.65E-09         |
| PCDH10                 | -1.68E+00 | 3.30E-15         | CA12                    | 1.36E+00 | 4.84E-09         |
| ZFP106                 | -1.54E+00 | 1.99E-13         | AGTRAP                  | 1.20E+00 | 7.32E-09         |
| PGCP                   | -3.57E+00 | 2.24E-12         | COL27A1                 | 1.20E+00 | 2.67E-08         |
| FAM20C                 | -1.62E+00 | 9.82E-12         | LY6E                    | 1.04E+00 | 9.23E-07         |
| OAS3                   | -4.48E+00 | 1.95E-11         | C12orf39                | 1.33E+00 | 1.53E-06         |
| EHBP1L1                | -1.84E+00 | 7.74E-11         | FAM84B                  | 1.02E+00 | 1.62E-06         |
| STARD9                 | -1.50E+00 | 7.74E-11         | BMP2                    | 2.18E+00 | 3.28E-06         |
| TTBK2                  | -1.61E+00 | 1.35E-10         | PROCR                   | 1.08E+00 | 3.88E-06         |
| MAMLD1                 | -1.74E+00 | 1.60E-10         | NDRG1                   | 1.15E+00 | 3.96E-06         |
| CDH2                   | -1.95E+00 | 6.45E-10         | OR2V2                   | 5.02E+00 | 5.36E-06         |
| OPTN                   | -1.30E+00 | 1.78E-09         | C19orf51                | 1.06E+00 | 1.19E-05         |
| MYO5B                  | -1.97E+00 | 1.78E-09         | PNPT1                   | 8.90E-01 | 8.07E-05         |
| PLA2G4A                | -3.32E+00 | 2.65E-09         | COTL1                   | 8.89E-01 | 9.17E-05         |
| APH1B                  | -1.36E+00 | 2.65E-09         | EDA2R                   | 3.64E+00 | 9.25E-05         |
| SLIT2                  | -1.19E+00 | 4.11E-09         | USPL1                   | 9.02E-01 | 9.25E-05         |
| FGF13                  | -2.68E+00 | 7.32E-09         | PPA2                    | 8.75E-01 | 9.25E-05         |
| DMRT3                  | -3.94E+00 | 1.17E-08         | FCRLB                   | 1.46E+00 | 9.25E-05         |
| VPS39                  | -1.18E+00 | 2.67E-08         | HMOX1                   | 1.01E+00 | 1.50E-04         |
| OSBPL7                 | -1.88E+00 | 8.23E-08         | SOD1                    | 8.45E-01 | 1.66E-04         |
| DDIT4L                 | -1.92E+00 | 1.61E-07         | TRMT12                  | 8.80E-01 | 2.39E-04         |
| GANC                   | -1.37E+00 | 1.87E-07         | ZNF813                  | 1.59E+00 | 2.71E-04         |
| LRP1                   | -1.19E+00 | 2.38E-07         | BBS7                    | 8.74E-01 | 2.79E-04         |
| CDAN1                  | -1.21E+00 | 2.62E-07         | PHC2                    | 1.50E+00 | 3.21E-04         |
| PVALB                  | -2.88E+00 | 4.56E-07         | CHST15                  | 8.55E-01 | 3.25E-04         |
| PRKCB                  | -1.34E+00 | 4.67E-07         | FAM150A                 | 2.24E+00 | 3.26E-04         |
| TP53INP1               | -1.23E+00 | 4.73E-07         | ALPL                    | 9.46E-01 | 3.88E-04         |
| FBXO27                 | -1.20E+00 | 5.58E-07         | C3orf18                 | 8.89E-01 | 4.24E-04         |
| ZSCAN29                | -1.12E+00 | 5.77E-07         | ADCYAP1R1               | 8.63E-01 | 6.47E-04         |
| UBR1                   | -1.13E+00 | 6.99E-07         | POLR3G                  | 1.02E+00 | 7.08E-04         |
| CCNDBP1                | -1.17E+00 | 8.57E-07         | FAM49B                  | 7.94E-01 | 7.91E-04         |
| WNT9A                  | -1.59E+00 | 8.57E-07         | TESC                    | 9.80E-01 | 8.36E-04         |
| AIFM2                  | -2.02E+00 | 9.38E-07         | MECR                    | 7.88E-01 | 8.53E-04         |
| SAMD12                 | -1.56E+00 | 1.53E-06         | THEM4                   | 7.73E-01 | 9.61E-04         |
| NACAD                  | -1.50E+00 | 2.22E-06         | INTS10                  | 7.84E-01 | 1.01E-03         |
| TMSB4X                 | -1.57E+00 | 4.63E-06         | C8orf33                 | 7.66E-01 | 1.20E-03         |
| PLCB2                  | -2.20E+00 | 5.84E-06         | VAMP3                   | 7.53E-01 | 1.30E-03         |
| KCNQ1                  | -1.42E+00 | 6.93E-06         | SPRED1                  | 8.30E-01 | 1.37E-03         |



|            |           |          |          |          |          |
|------------|-----------|----------|----------|----------|----------|
| TMEM62     | -1.13E+00 | 6.93E-06 | TBC1D14  | 7.60E-01 | 1.49E-03 |
| TMEM87A    | -1.04E+00 | 6.93E-06 | ARSJ     | 1.01E+00 | 1.52E-03 |
| CELF2      | -1.68E+00 | 1.09E-05 | ADA      | 8.15E-01 | 1.82E-03 |
| RYR2       | -2.66E+00 | 1.09E-05 | MRPL13   | 7.48E-01 | 1.96E-03 |
| LCMT2      | -1.04E+00 | 1.25E-05 | ETV1     | 1.38E+00 | 1.98E-03 |
| CLVS2      | -3.75E+00 | 1.25E-05 | BCL6B    | 7.82E-01 | 2.02E-03 |
| HOXA5      | -1.06E+00 | 1.28E-05 | EIF2C2   | 9.18E-01 | 2.24E-03 |
| ODZ1       | -5.34E+00 | 1.34E-05 | KHDRBS3  | 7.73E-01 | 2.25E-03 |
| PDE10A     | -1.41E+00 | 1.34E-05 | METTL21A | 7.54E-01 | 2.26E-03 |
| CACNA1G    | -1.68E+00 | 1.37E-05 | ZNF586   | 1.09E+00 | 2.51E-03 |
| LMO7       | -1.07E+00 | 1.77E-05 | DET1     | 1.48E+00 | 2.61E-03 |
| GOS2       | -1.84E+00 | 2.22E-05 | LIPT1    | 7.88E-01 | 2.61E-03 |
| OTX2       | -1.59E+00 | 2.44E-05 | COPS2    | 6.98E-01 | 2.66E-03 |
| STXBP5L    | -2.18E+00 | 3.24E-05 | SPRY1    | 7.84E-01 | 2.82E-03 |
| IQGAP3     | -9.85E-01 | 3.25E-05 | EPHA8    | 1.32E+00 | 3.25E-03 |
| KCTD12     | -9.82E-01 | 3.75E-05 | TRIM32   | 7.40E-01 | 3.38E-03 |
| MAP7       | -9.87E-01 | 4.98E-05 | FBXO32   | 8.60E-01 | 3.56E-03 |
| ST8SIA4    | -3.65E+00 | 5.99E-05 | DSCC1    | 7.02E-01 | 3.86E-03 |
| EFEMP2     | -1.83E+00 | 6.79E-05 | ARRDC2   | 7.77E-01 | 3.89E-03 |
| SNAP91     | -1.74E+00 | 6.80E-05 | TSTA3    | 7.19E-01 | 3.93E-03 |
| SLC16A5    | -4.61E+00 | 6.85E-05 | IER5     | 7.41E-01 | 3.95E-03 |
| SLC35F3    | -2.71E+00 | 6.91E-05 | C20orf27 | 7.05E-01 | 4.03E-03 |
| GPRC5C     | -1.47E+00 | 8.07E-05 | TATDN3   | 7.07E-01 | 4.05E-03 |
| TUBGCP4    | -9.67E-01 | 8.08E-05 | PYCRL    | 7.96E-01 | 4.19E-03 |
| ADAL       | -9.79E-01 | 8.57E-05 | TATDN1   | 7.12E-01 | 4.37E-03 |
| ACO10336.1 | -1.78E+00 | 8.57E-05 | HOMEZ    | 7.35E-01 | 4.51E-03 |
| OCLN       | -1.01E+00 | 8.57E-05 | C12orf24 | 6.99E-01 | 4.58E-03 |
| SNAP23     | -9.04E-01 | 8.67E-05 | CHRA1    | 6.92E-01 | 4.64E-03 |
| FREM2      | -1.23E+00 | 9.17E-05 | UAP1     | 6.91E-01 | 4.69E-03 |
| B3GALT1    | -1.92E+00 | 9.43E-05 | SLIRP    | 6.95E-01 | 4.69E-03 |
| LONRF2     | -1.08E+00 | 9.54E-05 | DCK      | 7.09E-01 | 4.69E-03 |
| APOBEC3B   | -1.86E+00 | 9.86E-05 | SLC11A1  | 1.59E+00 | 4.71E-03 |
| LAMB2      | -9.14E-01 | 1.03E-04 | ATP1A3   | 7.31E-01 | 4.89E-03 |
| THRB       | -1.01E+00 | 1.09E-04 | EID2     | 7.31E-01 | 5.03E-03 |
| DCHS1      | -1.40E+00 | 1.10E-04 | STAP2    | 1.36E+00 | 5.24E-03 |
| BEX2       | -8.93E-01 | 1.10E-04 | CYC1     | 7.69E-01 | 5.47E-03 |
| SLITRK5    | -9.34E-01 | 1.10E-04 | GLRX5    | 6.92E-01 | 5.55E-03 |
| SPINT2     | -1.34E+00 | 1.48E-04 | PLCD3    | 6.88E-01 | 5.98E-03 |
| TTL7       | -1.02E+00 | 1.48E-04 | MT1X     | 7.72E-01 | 6.08E-03 |
| MBP        | -1.58E+00 | 1.50E-04 | CACYBP   | 6.90E-01 | 6.15E-03 |
| NKAIN2     | -2.57E+00 | 1.50E-04 | ETV4     | 2.26E+00 | 6.51E-03 |
| PRRX1      | -2.19E+00 | 1.58E-04 | PFN2     | 6.65E-01 | 6.87E-03 |
| GPR126     | -1.56E+00 | 1.59E-04 | EXT1     | 6.82E-01 | 7.23E-03 |
| RAB9B      | -1.11E+00 | 2.42E-04 | EEF1E1   | 6.76E-01 | 7.42E-03 |
| NPY1R      | -5.47E+00 | 2.45E-04 | TADA2B   | 6.78E-01 | 7.79E-03 |
| CALCOCO1   | -9.32E-01 | 2.66E-04 | HSPE1    | 6.82E-01 | 7.81E-03 |
| HIP1       | -8.63E-01 | 2.88E-04 | MYCL1    | 6.89E-01 | 8.27E-03 |
| SPEN       | -8.13E-01 | 3.00E-04 | NCS1     | 6.71E-01 | 8.68E-03 |
| MCOLN3     | -1.04E+00 | 3.05E-04 | TRIP13   | 6.63E-01 | 8.90E-03 |
| FSTL1      | -8.40E-01 | 3.26E-04 | DHRS2    | 1.12E+00 | 9.69E-03 |

|          |           |          |            |          |          |
|----------|-----------|----------|------------|----------|----------|
| RAI2     | -1.24E+00 | 3.69E-04 | FXN        | 6.64E-01 | 9.89E-03 |
| PRKG2    | -3.28E+00 | 3.77E-04 | C3orf14    | 6.48E-01 | 1.00E-02 |
| DNAH11   | -1.50E+00 | 4.01E-04 | C1orf124   | 6.61E-01 | 1.01E-02 |
| SYT1     | -1.02E+00 | 4.42E-04 | PANK1      | 6.69E-01 | 1.01E-02 |
| MNS1     | -1.50E+00 | 4.48E-04 | SRD5A3     | 6.59E-01 | 1.02E-02 |
| NES      | -2.08E+00 | 4.63E-04 | CEBPB      | 1.44E+00 | 1.02E-02 |
| FRAS1    | -9.05E-01 | 4.71E-04 | ZFP36      | 7.78E-01 | 1.02E-02 |
| PARP9    | -1.22E+00 | 4.84E-04 | UBE2V2     | 7.77E-01 | 1.03E-02 |
| LGR5     | -1.24E+00 | 5.36E-04 | ATP6V1E2   | 7.22E-01 | 1.03E-02 |
| HSBP1L1  | -1.62E+00 | 5.49E-04 | GAL        | 6.68E-01 | 1.10E-02 |
| TMSB15A  | -8.47E-01 | 5.61E-04 | PSMB10     | 6.80E-01 | 1.15E-02 |
| LRRN2    | -1.50E+00 | 5.76E-04 | NDUFAF2    | 6.54E-01 | 1.16E-02 |
| CA8      | -2.74E+00 | 7.65E-04 | MRPS18C    | 6.69E-01 | 1.19E-02 |
| FOSL2    | -1.07E+00 | 7.71E-04 | ELOVL6     | 6.59E-01 | 1.21E-02 |
| LPL      | -2.67E+00 | 7.71E-04 | RGS3       | 7.58E-01 | 1.26E-02 |
| DUSP10   | -9.25E-01 | 7.73E-04 | SYNPO      | 9.38E-01 | 1.28E-02 |
| CUL9     | -8.66E-01 | 7.82E-04 | EFNA3      | 7.07E-01 | 1.29E-02 |
| ANKRD1   | -1.43E+00 | 7.91E-04 | FBXO9      | 6.38E-01 | 1.38E-02 |
| LGALS1   | -9.18E-01 | 8.20E-04 | NDUFC1     | 6.33E-01 | 1.48E-02 |
| BRSK1    | -9.49E-01 | 8.33E-04 | TCF7L2     | 6.52E-01 | 1.48E-02 |
| LYPD6    | -8.21E-01 | 8.39E-04 | MMP2       | 1.15E+00 | 1.51E-02 |
| FAT3     | -1.21E+00 | 8.46E-04 | ANAPC5     | 6.41E-01 | 1.53E-02 |
| CAMK4    | -1.12E+00 | 8.51E-04 | CHCHD7     | 6.44E-01 | 1.53E-02 |
| ADAMTSL3 | -2.54E+00 | 8.53E-04 | UROS       | 6.20E-01 | 1.54E-02 |
| ODZ4     | -1.75E+00 | 9.14E-04 | IMPDH1     | 6.23E-01 | 1.59E-02 |
| AHR      | -1.04E+00 | 9.14E-04 | C17orf96   | 6.43E-01 | 1.64E-02 |
| DGKA     | -9.66E-01 | 9.57E-04 | EXOSC4     | 8.37E-01 | 1.65E-02 |
| HOXA4    | -1.17E+00 | 9.60E-04 | ABCE1      | 6.23E-01 | 1.67E-02 |
| CXCL12   | -6.49E+00 | 9.72E-04 | KLRG2      | 6.96E-01 | 1.70E-02 |
| ATP9A    | -7.89E-01 | 9.76E-04 | NRARP      | 6.23E-01 | 1.78E-02 |
| MFSD6    | -1.36E+00 | 9.80E-04 | APRT       | 6.01E-01 | 1.81E-02 |
| C8orf4   | -4.56E+00 | 1.00E-03 | NELL1      | 4.33E+00 | 1.84E-02 |
| HOXA6    | -1.53E+00 | 1.01E-03 | PDZRN3     | 7.83E-01 | 1.86E-02 |
| CXCL16   | -8.57E-01 | 1.03E-03 | CHRNA4     | 1.54E+00 | 1.89E-02 |
| SRRM2    | -7.65E-01 | 1.04E-03 | GNG4       | 6.04E-01 | 1.91E-02 |
| FAM5C    | -5.47E+00 | 1.12E-03 | CHAC2      | 6.48E-01 | 1.93E-02 |
| ARHGEF17 | -8.73E-01 | 1.19E-03 | CKMT1A     | 9.27E-01 | 1.93E-02 |
| MOB3C    | -1.10E+00 | 1.34E-03 | NDUFA8     | 6.28E-01 | 1.99E-02 |
| CREBBP   | -7.67E-01 | 1.36E-03 | UQCRFS1    | 6.23E-01 | 2.01E-02 |
| IRS4     | -7.63E-01 | 1.49E-03 | CDC42EP4   | 6.41E-01 | 2.01E-02 |
| MCTP1    | -1.94E+00 | 1.52E-03 | PRPS2      | 6.12E-01 | 2.01E-02 |
| FAM134B  | -1.01E+00 | 1.58E-03 | AL050321.1 | 9.73E-01 | 2.01E-02 |
| PLEKHB1  | -9.16E-01 | 1.67E-03 | MARS2      | 6.33E-01 | 2.01E-02 |
| PLD5     | -4.92E+00 | 1.71E-03 | GABRD      | 9.27E-01 | 2.07E-02 |
| EPHB6    | -2.62E+00 | 1.82E-03 | DUSP14     | 6.46E-01 | 2.21E-02 |
| CDHR1    | -1.22E+00 | 1.88E-03 | TPRKB      | 6.04E-01 | 2.25E-02 |
| PTH1R    | -1.66E+00 | 1.94E-03 | GPRIN3     | 7.97E-01 | 2.31E-02 |
| NR3C2    | -8.99E-01 | 1.96E-03 | FAM179A    | 1.44E+00 | 2.34E-02 |
| HOXA3    | -1.01E+00 | 1.96E-03 | MRPS12     | 6.27E-01 | 2.36E-02 |
| KCNT2    | -2.55E+00 | 1.98E-03 | HRSP12     | 6.17E-01 | 2.36E-02 |

|          |           |          |           |          |          |
|----------|-----------|----------|-----------|----------|----------|
| PLEKHA7  | -9.72E-01 | 2.10E-03 | SEH1L     | 6.14E-01 | 2.37E-02 |
| SLIT3    | -1.32E+00 | 2.11E-03 | ISM2      | 8.18E-01 | 2.37E-02 |
| CTTNBP2  | -9.26E-01 | 2.16E-03 | BOP1      | 6.51E-01 | 2.38E-02 |
| ANK1     | -2.69E+00 | 2.23E-03 | LRIF1     | 6.14E-01 | 2.38E-02 |
| SLC12A6  | -9.55E-01 | 2.33E-03 | ETV5      | 1.92E+00 | 2.38E-02 |
| MED12    | -7.72E-01 | 2.41E-03 | DCTD      | 5.95E-01 | 2.40E-02 |
| ITGA6    | -8.36E-01 | 2.58E-03 | EGLN3     | 6.66E-01 | 2.50E-02 |
| MXD1     | -8.09E-01 | 2.67E-03 | TSKU      | 6.28E-01 | 2.51E-02 |
| SPTB     | -1.09E+00 | 2.84E-03 | CTSC      | 6.00E-01 | 2.52E-02 |
| PPP1R15A | -8.63E-01 | 2.84E-03 | PRR5L     | 8.74E-01 | 2.61E-02 |
| SPTAN1   | -7.31E-01 | 2.91E-03 | LSM4      | 5.89E-01 | 2.67E-02 |
| ITGA8    | -8.03E-01 | 2.94E-03 | HSPD1     | 5.79E-01 | 2.68E-02 |
| QPCT     | -1.20E+00 | 2.96E-03 | EYA2      | 7.07E-01 | 2.69E-02 |
| CXCR4    | -1.87E+00 | 3.02E-03 | ZNF85     | 1.49E+00 | 2.69E-02 |
| BASP1    | -2.46E+00 | 3.10E-03 | PPID      | 6.10E-01 | 2.69E-02 |
| DOCK9    | -7.75E-01 | 3.12E-03 | WDR77     | 6.01E-01 | 2.81E-02 |
| PKIB     | -1.09E+00 | 3.12E-03 | MAP2K6    | 6.31E-01 | 2.95E-02 |
| DYSF     | -2.20E+00 | 3.12E-03 | LSM12     | 5.77E-01 | 2.95E-02 |
| FLT3     | -2.17E+00 | 3.12E-03 | GTF2E2    | 6.07E-01 | 2.96E-02 |
| CLSTN2   | -3.42E+00 | 3.15E-03 | OR7D2     | 1.93E+00 | 2.96E-02 |
| AS3MT    | -8.31E-01 | 3.21E-03 | TNFRSF10D | 7.19E-01 | 2.99E-02 |
| CACNA2D3 | -9.55E-01 | 3.21E-03 | SLC25A33  | 6.02E-01 | 2.99E-02 |
| L3MBTL4  | -1.36E+00 | 3.21E-03 | RPL17     | 9.59E-01 | 2.99E-02 |
| MTMR11   | -1.12E+00 | 3.25E-03 | OAF       | 5.93E-01 | 3.06E-02 |
| KIF13B   | -9.17E-01 | 3.38E-03 | PVRL4     | 1.55E+00 | 3.18E-02 |
| KIF1A    | -2.18E+00 | 3.75E-03 | TMEM177   | 5.84E-01 | 3.21E-02 |
| SEMA6A   | -7.97E-01 | 3.84E-03 | WDYHV1    | 6.33E-01 | 3.21E-02 |
| TANC2    | -7.80E-01 | 3.84E-03 | TMEM14B   | 5.86E-01 | 3.30E-02 |
| TTC9     | -9.66E-01 | 3.86E-03 | SLC25A32  | 6.13E-01 | 3.32E-02 |
| NMNAT2   | -1.42E+00 | 3.89E-03 | SLC25A4   | 6.06E-01 | 3.35E-02 |
| TMEM132E | -2.65E+00 | 4.15E-03 | NEIL2     | 6.21E-01 | 3.40E-02 |
| KIAA1370 | -9.78E-01 | 4.22E-03 | QPRT      | 8.78E-01 | 3.40E-02 |
| ADRB2    | -1.00E+00 | 4.22E-03 | ACN9      | 5.95E-01 | 3.42E-02 |
| DLK2     | -8.59E-01 | 4.36E-03 | RASGEF1A  | 6.08E-01 | 3.56E-02 |
| PLAT     | -1.25E+00 | 4.69E-03 | ZNF44     | 8.05E-01 | 3.56E-02 |
| EP300    | -7.02E-01 | 4.88E-03 | MRPS18A   | 5.93E-01 | 3.57E-02 |
| GPM6A    | -1.09E+00 | 5.10E-03 | CHEK2     | 5.83E-01 | 3.57E-02 |
| BCOR     | -6.76E-01 | 5.37E-03 | RRP7A     | 5.78E-01 | 3.57E-02 |
| SIPA1L2  | -7.48E-01 | 5.38E-03 | LSM6      | 5.95E-01 | 3.64E-02 |
| KIAA1731 | -7.25E-01 | 5.55E-03 | SRXN1     | 5.81E-01 | 3.66E-02 |
| ISM1     | -1.01E+00 | 6.08E-03 | SNCB      | 1.02E+00 | 3.68E-02 |
| TP73     | -7.25E-01 | 6.08E-03 | RNF139    | 6.69E-01 | 3.68E-02 |
| NUP210   | -8.03E-01 | 6.12E-03 | WNT10B    | 6.49E-01 | 3.68E-02 |
| HAUS2    | -7.21E-01 | 6.12E-03 | FRAT2     | 5.71E-01 | 3.98E-02 |
| SMARCA1  | -7.18E-01 | 6.36E-03 | MLF1IP    | 5.54E-01 | 4.02E-02 |
| POU4F1   | -7.26E-01 | 6.36E-03 | TMEM145   | 6.91E-01 | 4.08E-02 |
| HES1     | -7.06E-01 | 6.68E-03 | SH2D5     | 6.86E-01 | 4.08E-02 |
| STAG3    | -1.75E+00 | 6.70E-03 | RIMS4     | 5.89E-01 | 4.13E-02 |
| KIAA1407 | -1.33E+00 | 6.73E-03 | FGFR4     | 6.04E-01 | 4.23E-02 |
| KIAA0355 | -7.34E-01 | 7.17E-03 | RABEPK    | 5.84E-01 | 4.24E-02 |

|          |           |          |         |          |          |
|----------|-----------|----------|---------|----------|----------|
| CGNL1    | -1.12E+00 | 7.44E-03 | BEND4   | 6.20E-01 | 4.33E-02 |
| SLAIN1   | -8.50E-01 | 7.44E-03 | FAM155B | 5.81E-01 | 4.33E-02 |
| CHSY3    | -1.09E+00 | 7.44E-03 | METT5   | 5.66E-01 | 4.33E-02 |
| BEND5    | -1.96E+00 | 7.61E-03 | CENPV   | 5.58E-01 | 4.33E-02 |
| TM6SF2   | -2.03E+00 | 7.61E-03 | IKBKE   | 7.65E-01 | 4.35E-02 |
| DOPEY1   | -7.61E-01 | 7.64E-03 | PRDX4   | 5.54E-01 | 4.41E-02 |
| DTX1     | -3.93E+00 | 7.90E-03 | SPRED2  | 5.82E-01 | 4.63E-02 |
| TSLP     | -1.30E+00 | 8.04E-03 | ISCA1   | 5.49E-01 | 4.68E-02 |
| ITGA7    | -1.16E+00 | 8.18E-03 | COL14A1 | 1.05E+00 | 4.73E-02 |
| NMI      | -1.10E+00 | 8.68E-03 | TSHZ3   | 5.54E-01 | 4.77E-02 |
| ZNF536   | -1.03E+00 | 8.68E-03 | POP1    | 5.98E-01 | 4.87E-02 |
| OPHN1    | -8.33E-01 | 8.90E-03 | DFFA    | 5.39E-01 | 4.87E-02 |
| ABCA3    | -1.15E+00 | 8.90E-03 | TOP1MT  | 5.55E-01 | 4.87E-02 |
| SLC13A4  | -1.03E+00 | 9.21E-03 | NOP16   | 5.71E-01 | 4.92E-02 |
| HEATR5B  | -7.11E-01 | 9.25E-03 | PNO1    | 5.60E-01 | 4.92E-02 |
| HOXB3    | -6.99E-01 | 9.25E-03 | GPATCH4 | 5.56E-01 | 4.92E-02 |
| SLFN5    | -1.46E+00 | 9.25E-03 | WDR67   | 5.57E-01 | 4.92E-02 |
| NME5     | -1.82E+00 | 9.32E-03 |         |          |          |
| CBLB     | -8.34E-01 | 9.43E-03 |         |          |          |
| FZD10    | -1.32E+00 | 9.69E-03 |         |          |          |
| DMRTA2   | -1.78E+00 | 9.69E-03 |         |          |          |
| CAV1     | -9.52E-01 | 1.00E-02 |         |          |          |
| TTC28    | -6.87E-01 | 1.03E-02 |         |          |          |
| GOLGA2   | -7.04E-01 | 1.03E-02 |         |          |          |
| LRRC57   | -7.03E-01 | 1.05E-02 |         |          |          |
| PLXNA4   | -3.18E+00 | 1.06E-02 |         |          |          |
| RALGAPA2 | -6.94E-01 | 1.09E-02 |         |          |          |
| IFI27L2  | -7.54E-01 | 1.10E-02 |         |          |          |
| NEK11    | -1.12E+00 | 1.10E-02 |         |          |          |
| SCAPER   | -7.45E-01 | 1.11E-02 |         |          |          |
| CADPS2   | -1.32E+00 | 1.13E-02 |         |          |          |
| GAP43    | -1.71E+00 | 1.14E-02 |         |          |          |
| SCN8A    | -1.02E+00 | 1.14E-02 |         |          |          |
| HERC1    | -7.10E-01 | 1.15E-02 |         |          |          |
| KIAA0889 | -6.92E-01 | 1.15E-02 |         |          |          |
| SLC2A10  | -7.85E-01 | 1.17E-02 |         |          |          |
| STAT3    | -6.51E-01 | 1.18E-02 |         |          |          |
| PLCL1    | -1.46E+00 | 1.19E-02 |         |          |          |
| ANG      | -1.56E+00 | 1.19E-02 |         |          |          |
| CBX5     | -6.50E-01 | 1.21E-02 |         |          |          |
| MAP6     | -1.10E+00 | 1.21E-02 |         |          |          |
| IGF2R    | -6.49E-01 | 1.22E-02 |         |          |          |
| PAK3     | -1.95E+00 | 1.26E-02 |         |          |          |
| FBN2     | -6.84E-01 | 1.27E-02 |         |          |          |
| CXorf58  | -2.17E+00 | 1.33E-02 |         |          |          |
| C8orf42  | -1.11E+00 | 1.37E-02 |         |          |          |
| SBNO1    | -6.58E-01 | 1.39E-02 |         |          |          |
| ABCB4    | -1.98E+00 | 1.39E-02 |         |          |          |
| C19orf57 | -8.36E-01 | 1.48E-02 |         |          |          |
| CELSR2   | -6.73E-01 | 1.50E-02 |         |          |          |

|          |           |          |
|----------|-----------|----------|
| RNF175   | -2.16E+00 | 1.52E-02 |
| PLD1     | -1.07E+00 | 1.52E-02 |
| HERC3    | -7.09E-01 | 1.53E-02 |
| MLL2     | -6.23E-01 | 1.53E-02 |
| KIAA0913 | -6.42E-01 | 1.53E-02 |
| EPST1    | -1.28E+00 | 1.56E-02 |
| SORT1    | -6.14E-01 | 1.56E-02 |
| EFTUD1   | -6.88E-01 | 1.64E-02 |
| ABCA5    | -7.47E-01 | 1.64E-02 |
| C12orf51 | -6.39E-01 | 1.64E-02 |
| KNTC1    | -6.50E-01 | 1.64E-02 |
| PPP1R12B | -7.63E-01 | 1.65E-02 |
| ATF7IP   | -6.93E-01 | 1.65E-02 |
| LMLN     | -7.46E-01 | 1.65E-02 |
| PRKCH    | -8.24E-01 | 1.66E-02 |
| LRRC33   | -1.12E+00 | 1.78E-02 |
| KANK1    | -6.96E-01 | 1.79E-02 |
| SYTL4    | -8.30E-01 | 1.81E-02 |
| PGPEP1   | -6.89E-01 | 1.81E-02 |
| INSR     | -7.89E-01 | 1.83E-02 |
| NMU      | -7.22E-01 | 1.86E-02 |
| DDAH2    | -7.19E-01 | 1.86E-02 |
| SAMD5    | -9.60E-01 | 1.87E-02 |
| MYO3A    | -1.11E+00 | 1.93E-02 |
| APBA1    | -1.39E+00 | 1.93E-02 |
| NTNG1    | -3.13E+00 | 1.93E-02 |
| RASGRP1  | -1.03E+00 | 1.93E-02 |
| LTK      | -9.18E-01 | 1.94E-02 |
| SLC17A5  | -6.47E-01 | 1.94E-02 |
| SZT2     | -7.14E-01 | 2.01E-02 |
| ANTXR2   | -8.25E-01 | 2.06E-02 |
| SLC46A3  | -7.09E-01 | 2.06E-02 |
| ALG1L    | -1.05E+00 | 2.07E-02 |
| DOCK8    | -9.09E-01 | 2.09E-02 |
| PHIP     | -6.87E-01 | 2.11E-02 |
| SRCAP    | -5.99E-01 | 2.14E-02 |
| PARD3B   | -8.67E-01 | 2.14E-02 |
| YPEL5    | -7.61E-01 | 2.14E-02 |
| PTPN14   | -7.53E-01 | 2.14E-02 |
| ZNF396   | -9.41E-01 | 2.14E-02 |
| C2orf72  | -7.30E-01 | 2.18E-02 |
| DKK3     | -9.09E-01 | 2.21E-02 |
| GOLGB1   | -8.13E-01 | 2.22E-02 |
| AFF3     | -6.75E-01 | 2.24E-02 |
| MAP1A    | -1.48E+00 | 2.24E-02 |
| GPX3     | -5.99E-01 | 2.25E-02 |
| MAP2     | -1.81E+00 | 2.27E-02 |
| EGR2     | -1.42E+00 | 2.31E-02 |
| SERPING1 | -2.19E+00 | 2.34E-02 |
| DIAPH3   | -6.52E-01 | 2.37E-02 |

|          |           |          |
|----------|-----------|----------|
| VGLL2    | -1.03E+00 | 2.37E-02 |
| TRIB2    | -7.27E-01 | 2.38E-02 |
| LIG4     | -6.51E-01 | 2.38E-02 |
| SYNJ1    | -6.30E-01 | 2.40E-02 |
| EXOC6B   | -6.33E-01 | 2.47E-02 |
| SDK1     | -7.43E-01 | 2.51E-02 |
| RIMBP3   | -2.38E+00 | 2.51E-02 |
| AMOTL2   | -7.17E-01 | 2.51E-02 |
| IQGAP1   | -6.16E-01 | 2.51E-02 |
| ARL10    | -5.98E-01 | 2.51E-02 |
| GALC     | -8.94E-01 | 2.52E-02 |
| SMC4     | -6.18E-01 | 2.55E-02 |
| DAPK1    | -6.17E-01 | 2.57E-02 |
| TAP1     | -6.30E-01 | 2.58E-02 |
| CYBRD1   | -7.84E-01 | 2.61E-02 |
| MYO7A    | -3.57E+00 | 2.64E-02 |
| LBH      | -9.74E-01 | 2.66E-02 |
| BAI3     | -8.79E-01 | 2.67E-02 |
| BCL6     | -7.79E-01 | 2.68E-02 |
| C7orf46  | -8.59E-01 | 2.68E-02 |
| SLC44A5  | -6.37E-01 | 2.69E-02 |
| BICC1    | -6.35E-01 | 2.83E-02 |
| ARHGAP33 | -6.85E-01 | 2.85E-02 |
| SLC22A23 | -6.30E-01 | 2.89E-02 |
| ARHGAP31 | -7.40E-01 | 2.95E-02 |
| FAM65B   | -1.66E+00 | 2.95E-02 |
| ARHGAP27 | -7.90E-01 | 2.95E-02 |
| HDX      | -8.43E-01 | 2.96E-02 |
| ARMCX4   | -7.74E-01 | 2.96E-02 |
| RGS7     | -1.15E+00 | 3.01E-02 |
| DST      | -6.06E-01 | 3.02E-02 |
| TKTL1    | -1.65E+00 | 3.13E-02 |
| GPC5     | -1.44E+00 | 3.13E-02 |
| RAPGEF5  | -7.89E-01 | 3.17E-02 |
| RFX6     | -1.93E+00 | 3.28E-02 |
| NCKAP5L  | -6.12E-01 | 3.29E-02 |
| MDGA1    | -6.45E-01 | 3.32E-02 |
| COL24A1  | -1.32E+00 | 3.40E-02 |
| COLEC12  | -7.55E-01 | 3.43E-02 |
| TOP2A    | -5.69E-01 | 3.44E-02 |
| SPOCK3   | -1.58E+00 | 3.53E-02 |
| CHD7     | -5.95E-01 | 3.56E-02 |
| CLSPN    | -6.03E-01 | 3.57E-02 |
| TBC1D5   | -6.61E-01 | 3.57E-02 |
| RNASEL   | -8.67E-01 | 3.57E-02 |
| AGTR1    | -1.10E+00 | 3.57E-02 |
| IFITM1   | -1.18E+00 | 3.58E-02 |
| FRMPD3   | -8.42E-01 | 3.59E-02 |
| KDM5A    | -5.78E-01 | 3.61E-02 |
| CLSTN3   | -6.39E-01 | 3.64E-02 |

|          |           |          |
|----------|-----------|----------|
| RIPK1    | -5.84E-01 | 3.64E-02 |
| SYNGAP1  | -6.82E-01 | 3.65E-02 |
| CD109    | -7.73E-01 | 3.66E-02 |
| MYO5C    | -7.17E-01 | 3.67E-02 |
| RNF144B  | -9.65E-01 | 3.67E-02 |
| ACVR1C   | -1.67E+00 | 3.68E-02 |
| FGF12    | -2.56E+00 | 3.68E-02 |
| TCN2     | -2.64E+00 | 3.69E-02 |
| FBN1     | -6.99E-01 | 3.73E-02 |
| MBD5     | -6.31E-01 | 3.74E-02 |
| PRKCSH   | -5.82E-01 | 3.78E-02 |
| EFNB3    | -5.96E-01 | 3.84E-02 |
| DNAJC6   | -6.44E-01 | 3.84E-02 |
| LHX8     | -8.29E-01 | 3.85E-02 |
| CDKL5    | -9.56E-01 | 3.85E-02 |
| PROX1    | -1.02E+00 | 3.91E-02 |
| HIF1A    | -5.81E-01 | 4.04E-02 |
| ASH1L    | -5.75E-01 | 4.07E-02 |
| KIAA1539 | -7.25E-01 | 4.15E-02 |
| PLXNA3   | -5.98E-01 | 4.17E-02 |
| PNPLA8   | -8.55E-01 | 4.17E-02 |
| TFAP2A   | -6.24E-01 | 4.20E-02 |
| C7orf13  | -1.18E+00 | 4.24E-02 |
| EBF4     | -6.90E-01 | 4.25E-02 |
| C5orf42  | -6.20E-01 | 4.29E-02 |
| MAN1C1   | -8.29E-01 | 4.31E-02 |
| MAGI1    | -7.91E-01 | 4.32E-02 |
| KAT6B    | -5.87E-01 | 4.33E-02 |
| RAD54L2  | -5.87E-01 | 4.33E-02 |
| KIF14    | -6.03E-01 | 4.34E-02 |
| DNMBP    | -6.14E-01 | 4.35E-02 |
| TP53BP1  | -5.83E-01 | 4.36E-02 |
| FAM71E1  | -1.02E+00 | 4.41E-02 |
| TP53INP2 | -6.16E-01 | 4.41E-02 |
| SH3D21   | -9.24E-01 | 4.42E-02 |
| CCDC15   | -8.52E-01 | 4.46E-02 |
| PCDH17   | -7.70E-01 | 4.48E-02 |
| MON2     | -5.96E-01 | 4.56E-02 |
| BMF      | -1.31E+00 | 4.61E-02 |
| SCD5     | -6.03E-01 | 4.61E-02 |
| FRY      | -8.12E-01 | 4.62E-02 |
| CYP1B1   | -1.99E+00 | 4.62E-02 |
| YWHAG    | -5.30E-01 | 4.62E-02 |
| NOTCH2   | -5.47E-01 | 4.63E-02 |
| KAT6A    | -5.59E-01 | 4.73E-02 |
| INPP1    | -6.93E-01 | 4.73E-02 |
| TAOK1    | -6.24E-01 | 4.73E-02 |
| ZZEF1    | -5.65E-01 | 4.77E-02 |
| C15orf42 | -5.55E-01 | 4.77E-02 |
| ATP1B2   | -7.67E-01 | 4.77E-02 |

|        |           |          |
|--------|-----------|----------|
| GAS2L3 | -6.41E-01 | 4.77E-02 |
| NFAT5  | -5.90E-01 | 4.82E-02 |
| AMOTL1 | -5.54E-01 | 4.82E-02 |
| PTPN21 | -6.11E-01 | 4.84E-02 |
| NNT    | -5.69E-01 | 4.84E-02 |
| ERC1   | -5.93E-01 | 4.87E-02 |
| VPS13C | -6.20E-01 | 4.87E-02 |
| MYH10  | -5.54E-01 | 4.87E-02 |
| GFRA1  | -1.13E+00 | 4.91E-02 |
| NRP1   | -5.95E-01 | 4.92E-02 |
| GCA    | -6.25E-01 | 4.92E-02 |
| ASAP2  | -6.37E-01 | 4.93E-02 |
| HSPA2  | -1.24E+00 | 4.97E-02 |



## S3 mRNAs enriched in HEK-miR-155 compensated IP

n=100

| ENSMBL ID       | Gene ID  | difference log2 FC | p.value  | FDR 10% |
|-----------------|----------|--------------------|----------|---------|
| ENSG00000006062 | MAP3K14  | 6.32E-01           | 9.67E-04 |         |
| ENSG00000008083 | JARID2   | 1.03E+00           | 2.59E-04 |         |
| ENSG00000010072 | C1orf124 | 6.68E-01           | 2.99E-04 |         |
| ENSG00000038382 | TRIO     | 5.75E-01           | 8.37E-04 |         |
| ENSG00000039319 | ZFYVE16  | 7.21E-01           | 4.39E-04 |         |
| ENSG00000046604 | DSG2     | 6.99E-01           | 1.40E-04 |         |
| ENSG00000049245 | VAMP3    | 8.93E-01           | 2.49E-04 |         |
| ENSG00000063245 | EPN1     | 6.62E-01           | 8.17E-04 |         |
| ENSG00000063438 | AHRR     | 3.90E-01           | 1.10E-03 |         |
| ENSG00000064655 | EYA2     | 7.11E-01           | 5.18E-04 |         |
| ENSG00000071539 | TRIP13   | 5.78E-01           | 9.07E-04 |         |
| ENSG00000072415 | MPP5     | 4.21E-01           | 1.83E-03 |         |
| ENSG00000072518 | MARK2    | 6.07E-01           | 5.08E-04 |         |
| ENSG00000087338 | GMCL1    | 7.61E-01           | 3.29E-04 |         |
| ENSG00000088543 | C3orf18  | 8.17E-01           | 7.48E-04 |         |
| ENSG00000099889 | ARVCF    | 6.79E-01           | 1.13E-03 |         |
| ENSG00000100065 | CARD10   | 6.13E-01           | 4.09E-04 |         |
| ENSG00000104613 | INTS10   | 5.33E-01           | 4.19E-04 |         |
| ENSG00000105643 | ARRDC2   | 7.70E-01           | 5.28E-04 |         |
| ENSG00000108219 | TSPAN14  | 4.69E-01           | 1.18E-03 |         |
| ENSG00000108406 | DHX40    | 9.32E-01           | 1.20E-04 |         |
| ENSG00000109113 | RAB34    | 5.04E-01           | 9.37E-04 |         |
| ENSG00000109756 | RAPGEF2  | 1.01E+00           | 1.69E-04 |         |
| ENSG00000112079 | STK38    | 4.17E-01           | 1.50E-03 |         |
| ENSG00000112146 | FBXO9    | 5.82E-01           | 3.59E-04 |         |
| ENSG00000113658 | SMAD5    | 4.17E-01           | 1.53E-03 |         |
| ENSG00000117139 | KDM5B    | 4.66E-01           | 8.07E-04 |         |
| ENSG00000117906 | RCN2     | 5.05E-01           | 1.96E-03 |         |
| ENSG00000119401 | TRIM32   | 1.01E+00           | 1.30E-04 |         |
| ENSG00000119946 | CNNM1    | 8.40E-01           | 1.89E-04 |         |
| ENSG00000120539 | MASTL    | 5.60E-01           | 5.68E-04 |         |
| ENSG00000121297 | TSHZ3    | 8.34E-01           | 4.78E-04 |         |
| ENSG00000121931 | LRIF1    | 7.20E-01           | 2.69E-04 |         |
| ENSG00000128016 | ZFP36    | 1.42E+00           | 1.50E-04 |         |
| ENSG00000130758 | MAP3K10  | 1.20E+00           | 1.59E-04 |         |
| ENSG00000132405 | TBC1D14  | 6.70E-01           | 1.09E-03 |         |
| ENSG00000132952 | USPL1    | 1.11E+00           | 5.98E-05 |         |
| ENSG00000133275 | CSNK1G2  | 1.11E+00           | 3.19E-04 |         |
| ENSG00000134686 | PHC2     | 1.58E+00           | 9.97E-06 |         |
| ENSG00000136888 | ATP6V1G1 | 8.85E-01           | 2.09E-04 |         |
| ENSG00000138035 | PNPT1    | 6.14E-01           | 1.20E-03 |         |
| ENSG00000138686 | BBS7     | 7.19E-01           | 5.98E-04 |         |
| ENSG00000138777 | PPA2     | 4.79E-01           | 1.34E-03 |         |
| ENSG00000140543 | DET1     | 1.73E+00           | 2.99E-05 |         |
| ENSG00000140807 | NKD1     | 1.11E+00           | 2.29E-04 |         |
| ENSG00000142168 | SOD1     | 5.21E-01           | 1.85E-03 |         |
| ENSG00000143344 | RGL1     | 6.21E-01           | 1.26E-03 |         |

|                 |          |          |          |
|-----------------|----------|----------|----------|
| ENSG00000144401 | METTL21A | 6.39E-01 | 6.98E-04 |
| ENSG00000147650 | LRP12    | 4.10E-01 | 1.60E-03 |
| ENSG00000147862 | NFIB     | 6.21E-01 | 6.18E-04 |
| ENSG00000148737 | TCF7L2   | 1.11E+00 | 1.99E-05 |
| ENSG00000152256 | PDK1     | 3.65E-01 | 1.54E-03 |
| ENSG00000154511 | FAM69A   | 6.85E-01 | 4.29E-04 |
| ENSG00000155097 | ATP6V1C1 | 6.73E-01 | 3.49E-04 |
| ENSG00000156136 | DCK      | 7.92E-01 | 1.79E-04 |
| ENSG00000156273 | BACH1    | 6.18E-01 | 1.44E-03 |
| ENSG00000157978 | LDLRAP1  | 5.79E-01 | 7.58E-04 |
| ENSG00000158717 | RNF166   | 5.93E-01 | 1.38E-03 |
| ENSG00000159792 | PSKH1    | 8.89E-01 | 6.98E-05 |
| ENSG00000159921 | GNE      | 3.90E-01 | 1.97E-03 |
| ENSG00000161326 | DUSP14   | 6.17E-01 | 6.88E-04 |
| ENSG00000162783 | IER5     | 8.73E-01 | 4.49E-04 |
| ENSG00000163577 | EIF5A2   | 4.25E-01 | 1.81E-03 |
| ENSG00000164144 | ARFIP1   | 5.35E-01 | 9.27E-04 |
| ENSG00000164778 | EN2      | 8.11E-01 | 2.19E-04 |
| ENSG00000165288 | BRWD3    | 6.91E-01 | 3.39E-04 |
| ENSG00000165323 | FAT3     | 1.12E+00 | 9.97E-05 |
| ENSG00000166200 | COPS2    | 6.11E-01 | 1.49E-03 |
| ENSG00000167670 | CHAF1A   | 4.36E-01 | 1.28E-03 |
| ENSG00000169139 | UBE2V2   | 5.57E-01 | 1.21E-03 |
| ENSG00000169762 | TAPT1    | 5.33E-01 | 1.72E-03 |
| ENSG00000170345 | FOS      | 5.50E-01 | 1.27E-03 |
| ENSG00000172216 | CEBPB    | 1.91E+00 | 4.98E-05 |
| ENSG00000173011 | TADA2B   | 7.01E-01 | 4.88E-04 |
| ENSG00000173852 | DPY19L1  | 6.46E-01 | 5.78E-04 |
| ENSG00000176396 | EID2     | 6.11E-01 | 9.17E-04 |
| ENSG00000177674 | AGTRAP   | 1.41E+00 | 3.99E-05 |
| ENSG00000178177 | LCORL    | 7.71E-01 | 3.69E-04 |
| ENSG00000179104 | TMTC2    | 5.51E-01 | 1.63E-03 |
| ENSG00000179604 | CDC42EP4 | 5.57E-01 | 8.27E-04 |
| ENSG00000180370 | PAK2     | 6.20E-01 | 3.89E-04 |
| ENSG00000182022 | CHST15   | 1.06E+00 | 7.97E-05 |
| ENSG00000182986 | ZNF320   | 9.29E-01 | 2.39E-04 |
| ENSG00000185658 | BRWD1    | 5.40E-01 | 8.47E-04 |
| ENSG00000185722 | ANKFY1   | 4.22E-01 | 1.52E-03 |
| ENSG00000196628 | TCF4     | 1.57E+00 | 8.97E-05 |
| ENSG00000196705 | ZNF431   | 6.75E-01 | 4.98E-04 |
| ENSG00000196739 | COL27A1  | 9.22E-01 | 2.89E-04 |
| ENSG00000197694 | SPTAN1   | 4.47E-01 | 1.01E-03 |
| ENSG00000198561 | CTNND1   | 6.80E-01 | 5.38E-04 |
| ENSG00000198680 | TUSC1    | 5.12E-01 | 6.38E-04 |
| ENSG00000198740 | ZNF652   | 7.35E-01 | 3.09E-04 |
| ENSG00000204516 | MICB     | 8.65E-01 | 3.79E-04 |
| ENSG00000204604 | ZNF468   | 6.99E-01 | 9.77E-04 |
| ENSG00000213699 | C2orf18  | 4.47E-01 | 1.70E-03 |
| ENSG00000213799 | ZNF845   | 1.21E+00 | 1.99E-04 |
| ENSG00000213930 | GALT     | 6.70E-01 | 1.19E-03 |

|                 |        |          |          |
|-----------------|--------|----------|----------|
| ENSG00000215271 | HOMEZ  | 7.32E-01 | 1.10E-04 |
| ENSG00000215472 | RPL17  | 9.19E-01 | 2.79E-04 |
| ENSG00000232040 | SCAND3 | 7.26E-01 | 5.58E-04 |

S4 differentially expressed miRNA in TL fractions

ct-values normalized to median ct-value

Median 0.990661094  
STDEV 0.030789855

|                                | ratio                           |                               | ratio                           |                                               |                                                |
|--------------------------------|---------------------------------|-------------------------------|---------------------------------|-----------------------------------------------|------------------------------------------------|
| miRNAs lower in<br>HEK-miR-155 | HEK-empty TL/<br>HEK-miR-155 TL | miRNAs lower in<br>HEK-vector | HEK-empty TL/<br>HEK-miR-155 TL | miRNAs only detectable in<br>TL of HEK-vector | miRNAs only detectable in<br>TL of HEK-miR-155 |
| hsa-miR-224                    | 0.860880328                     | hsa-miR-331-5p                | 1.021600629                     | hsa-miR-1                                     | hsa-miR-150                                    |
| hsa-miR-576-3p                 | 0.893519262                     | hsa-miR-629                   | 1.02198609                      | hsa-miR-135b                                  | hsa-miR-198                                    |
| hsa-miR-98                     | 0.904465719                     | hsa-miR-199a-3p               | 1.022326835                     | hsa-miR-142-5p                                | <b>hsa-miR-155</b>                             |
| hsa-miR-181c                   | 0.909513572                     | hsa-let-7a                    | 1.023287961                     | hsa-miR-302c                                  | hsa-miR-483-5p                                 |
| hsa-miR-204                    | 0.915365851                     | hsa-miR-221                   | 1.02417777                      | hsa-miR-411                                   | hsa-miR-501-3p                                 |
| hsa-miR-589                    | 0.922662438                     | hsa-miR-142-3p                | 1.025954272                     | hsa-miR-561                                   |                                                |
| hsa-miR-215                    | 0.928533196                     | hsa-miR-130a                  | 1.026863186                     | hsa-miR-570                                   |                                                |
| hsa-miR-628-5p                 | 0.934547317                     | hsa-miR-449b                  | 1.029846497                     | hsa-miR-888                                   |                                                |
| hsa-miR-138                    | 0.937462837                     | hsa-miR-758                   | 1.031704911                     | hsa-miR-891a                                  |                                                |
| hsa-miR-223                    | 0.938687796                     | hsa-miR-375                   | 1.031955639                     | hsa-miR-147                                   |                                                |
| hsa-miR-181a                   | 0.941081492                     | hsa-miR-106a                  | 1.039823675                     | hsa-miR-219-1-3p                              |                                                |
| hsa-miR-338-3p                 | 0.942393271                     | hsa-miR-548d-5p               | 1.041274195                     |                                               |                                                |
| hsa-miR-202                    | 0.943413652                     | hsa-miR-20a                   | 1.048135149                     |                                               |                                                |
| hsa-miR-218                    | 0.94883009                      | hsa-miR-296-3p                | 1.049855797                     |                                               |                                                |
| hsa-miR-545                    | 0.948942201                     | hsa-miR-199b                  | 1.07511416                      |                                               |                                                |
| hsa-miR-203                    | 0.953586802                     | hsa-miR-501                   | 1.083228002                     |                                               |                                                |
| hsa-miR-15a                    | 0.955358821                     | hsa-miR-34a                   | 1.134814351                     |                                               |                                                |
| hsa-miR-148a                   | 0.9571446                       |                               |                                 |                                               |                                                |
| hsa-miR-95                     | 0.957434249                     |                               |                                 |                                               |                                                |
| n=19                           |                                 | n=17                          |                                 | n=11                                          | n=5                                            |

S5 primer sequences

| Name          | Sequence (5'>3')                 |
|---------------|----------------------------------|
| miR-155_f     | TTTAAGCTTCTATATGCTGTCACTCCAGCTTT |
| miR-155_r     | TTTCTCGAGTGGCAGATAGCTTCTGGAAT    |
| qRT_CCND1_f   | ACGAAGGTCTGCGCGTGTT              |
| qRT_CCND1_r   | CCGCTGGCCATGAACTACCT             |
| qRT_CEBPB_f1  | ctctctgcttctccctctgc             |
| qRT_CEBPB_r1  | gattgcatcaacttcgaaacc            |
| qRT_PHC2_f    | caccaagtggaatgtagaagacg          |
| qRT_PHC2_r    | ggaattcctctgctatctcctg           |
| qRT_GAPDH_f   | gctctctgctcctcctgttc             |
| qRT_GAPDH_r   | acgaccaaatccgttgactc             |
| qRT_DCTN2_f   | actagcgacctacctgagga             |
| qRT_DCTN2_r   | tcataggcagcattaggattgac          |
| ZFP36_qRT_f   | ccaagtgtgcaagctcag               |
| ZFP36_qRT_r   | ccccaagaacctcggaag               |
| qRT_ZNF652_f  | aagcagtacttcgacgaacaca           |
| qRT_ZNF652_r  | agctttgccacagatttcac             |
| qRT_BACH1_f   | tgcatcacttcctcaaac               |
| qRT_BACH1_r   | ctttcaagacgctgccaaa              |
| qRT_FBXO9_f   | tggtgtgcagaggattctacat           |
| qRT_FBXO9_r   | ctccaggacgtgtacggaac             |
| ETV1_qRT_f    | cccagaaaaattcgatggag             |
| ETV1_qRT_r    | tatgtgggtcctcccgata              |
| ETV4_qRT_f    | gcagttgttcttgattcca              |
| ETV4_qRT_r    | actctggggctcctcttg               |
| ETV5_qRT_f    | catcctacatgagaggggggta           |
| ETV5_qRT_r    | aagtataatcggggatcttttca          |
| qRT_DUSP14_f1 | gcacactggactcttgaggaa            |
| qRT_DUSP14_r1 | cggcaagaccagagtgttt              |
| JARID2_qRT_f  | aaggtggacaccaacactcac            |
| JARID2_qRT_r  | gaggacggtgaggttccat              |
| AGTRAP_qRT_f  | atcgacgccataagcatgt              |
| AGTRAP_qRT_r  | atgctgatgtgcacgatgtc             |

S6 NGS read counts

| <b>Cell line</b> | <b>Fraction</b> | <b>Replicate</b> | <b>Total read count</b> | <b>Useable read count</b> | <b>% of total count</b> |
|------------------|-----------------|------------------|-------------------------|---------------------------|-------------------------|
| HEK-vector       | IP              | 1                | 38847512                | 26697792                  | 68.72                   |
| HEK-vector       | IP              | 2                | 35200455                | 24681908                  | 70.12                   |
| HEK-vector       | IP              | 3                | 34633980                | 24064313                  | 69.48                   |
| HEK-vector       | TL              | 1                | 77647039                | 56479074                  | 72.74                   |
| HEK-vector       | TL              | 2                | 51827659                | 38276456                  | 73.85                   |
| HEK-vector       | TL              | 3                | 66831196                | 48956322                  | 73.25                   |
| HEK-miR-155      | IP              | 1                | 33679129                | 23334445                  | 69.28                   |
| HEK-miR-155      | IP              | 2                | 34442706                | 24432299                  | 70.94                   |
| HEK-miR-155      | IP              | 3                | 35082010                | 24734154                  | 70.5                    |
| HEK-miR-155      | TL              | 1                | 69955916                | 50830568                  | 72.66                   |
| HEK-miR-155      | TL              | 2                | 71385945                | 53103311                  | 74.39                   |
| HEK-miR-155      | TL              | 3                | 72132189                | 53445065                  | 74.09                   |

Raw data were sorted and analyzed according to barcoded library adaptors allowing one basepair mismatch within the barcode sequence
